# Supplementary material
Source: Springer Nature journal article supplement (https://www.springermedizin.de/resource/supplementary/12916_2007_137_MOESM1_ESM.pdf/9599252)
Supplement: MOESM1 [file 9599252]

Assessed for eligibility (N=293)

Excluded (N=112)

- Not meeting inclusion criteria (N=45)
- Refused randomization (N=42)
- Other reasons (N=25)

Randomized (N=181)

Allocated to usual care + paroxetine (N=85)

Completed treatment as allocated

- Yes (N=55)
- No (N=30), no consistent antidepressant use

Co-intervention:

15 patients received specialized help from mental health services

Allocated to usual care (N=96)

Completed treatment as allocated

- Yes (N=78)
- No (N=18), received antidepressants

Co-intervention:

26 patients received specialized help from mental health services

MADRS\* scores:

N=85 at baseline

N=80 at 6 weeks

N=77 at 13 weeks

N=76 at 26 weeks

N=67 at 52 weeks

66 have complete follow-up on the MADRS

19 had no complete follow-up:

- did not feel like it anymore (N=3)
- found it laboriously (N=4)
- felt discontent with treatment or research (N=2)
- no contact possible (N=1)
- reason unknown (N=9)

MADRS\* scores:

N=96 at baseline

N=89 at 6 weeks

N=83 at 13 weeks

N=79 at 26 weeks

N=72 at 52 weeks

65 have complete follow-up on the MADRS

31 had no complete follow-up:

- did not feel like it anymore (N=1)
- found it laboriously (N=5)
- felt discontent with treatment or research (N=4)
- no contact possible (N=3)
- reason unknown (N=18)
